# Supplementary material
Source: PubMed Central journal article supplement (PMC3458403)
Supplement: 1206953109_pnas.1206953109_SI.pdf [file 1206953109_pnas.1206953109_SI.pdf]

# Supporting Information

Schweizer et al. 10.1073/pnas.1206953109

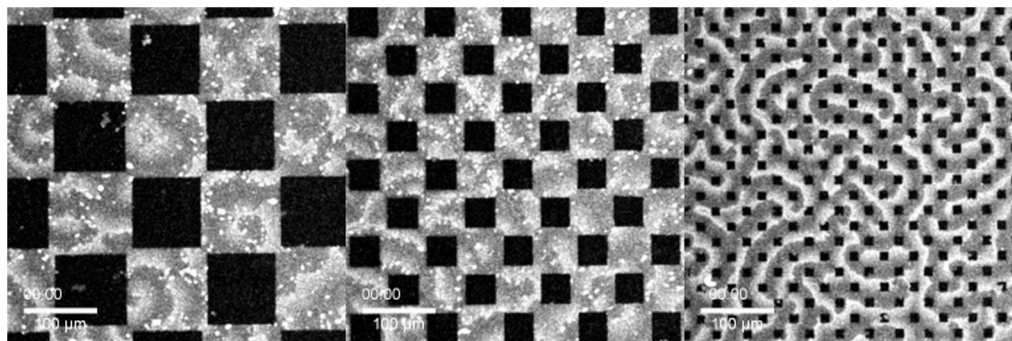

**Movie S1.** Confocal fluorescence micrographs of Cy5-labeled MinE in Min protein waves on membrane checkerboard patterns (MinD = 0.8  $\mu$ M, MinE = 0.5  $\mu$ M with 10 mol % MinE-Cy5). Scale bar is 100  $\mu$ m.

[Movie S1 \(MOV\)](#)

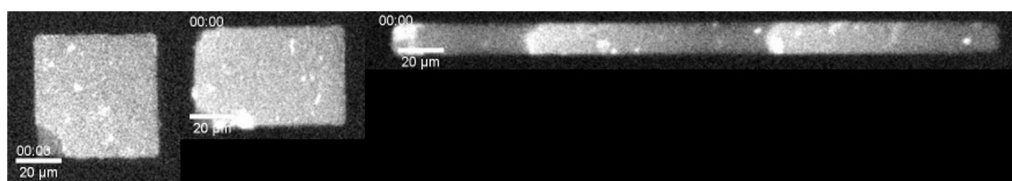

**Movie S2.** Confocal fluorescence micrographs of Cy5-labeled MinE in Min protein waves on rectangular membranes with different aspect ratios (MinD = 0.8  $\mu$ M, MinE = 0.5  $\mu$ M with 10 mol % MinE-Cy5). Scale bar is 100  $\mu$ m.

[Movie S2 \(MOV\)](#)

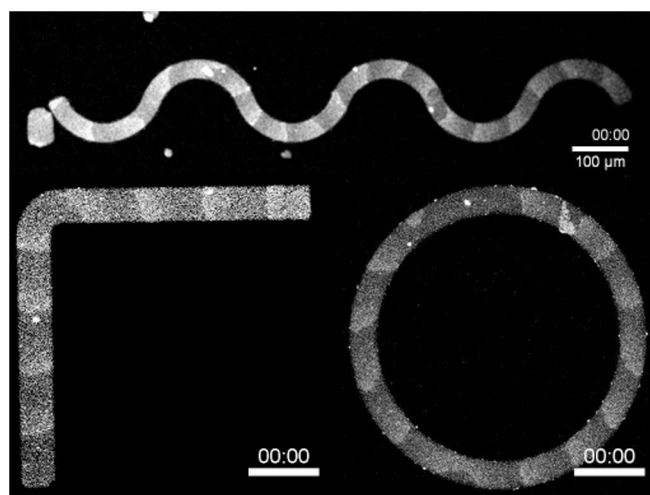

**Movie S3.** Confocal fluorescence micrographs of Cy5-labeled MinE in Min protein waves on membranes with different shapes (MinD = 0.8  $\mu$ M, MinE = 0.5  $\mu$ M with 10 mol % MinE-Cy5). Scale bar is 100  $\mu$ m.

[Movie S3 \(MOV\)](#)

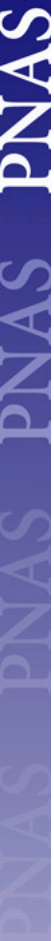

Movie S4 (MOV)

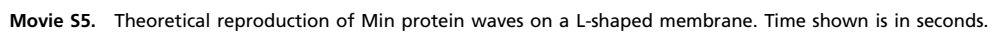

Movie S5 (MOV)

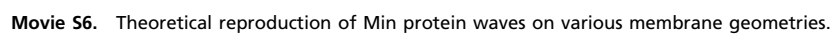

Movie S6 (MOV)

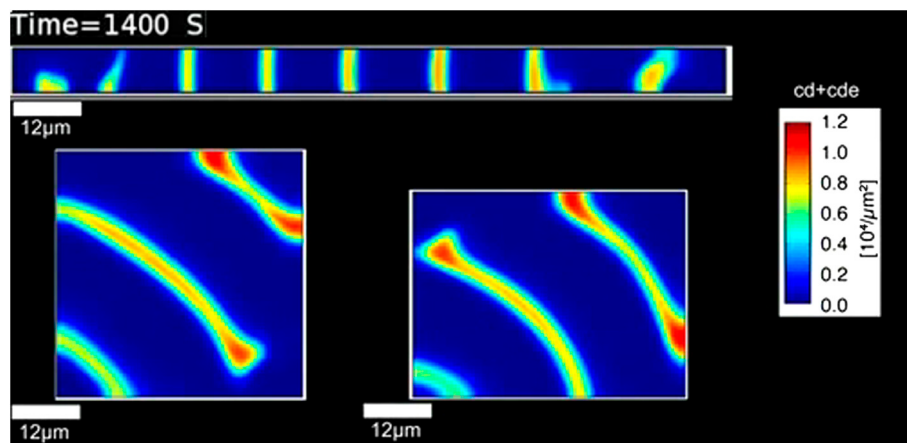

**Movie S7.** Theoretical reproduction of Min protein waves on membrane patches with different aspect ratios.

Movie S7 (MOV)

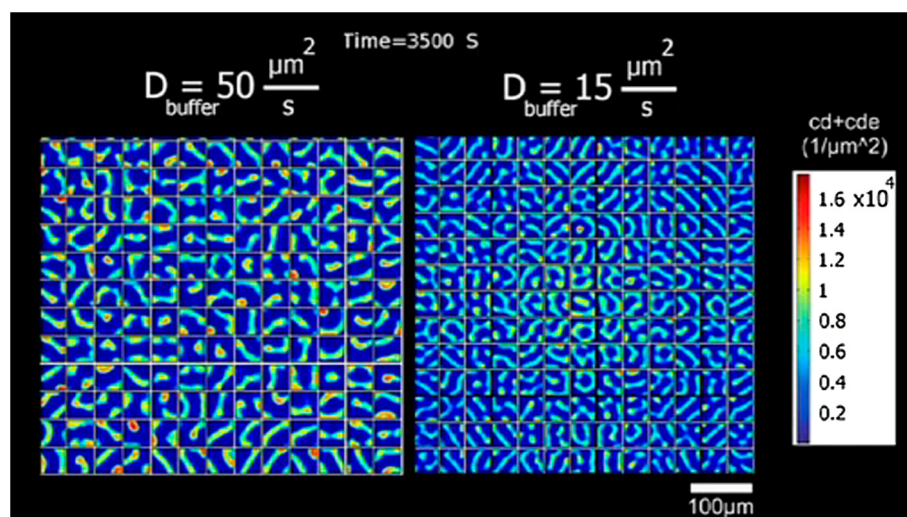

**Movie S8.** Theoretical reproduction of diffusive coupling at different diffusion constants of the proteins in solution.

Movie S8 (MOV)

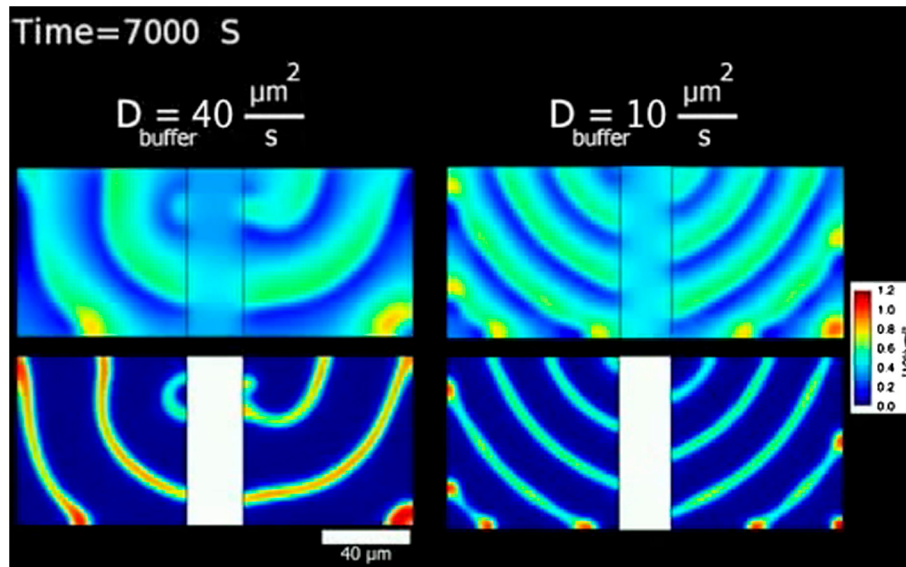

**Movie S9.** Simulation of cytoplasmic protein densities using our theoretical model.

[Movie S9 \(MOV\)](#)
